# Supplementary material
Source: PubMed Central journal article supplement (PMC8549497)
Supplement: jvi.00996-21-s0004.pdf [file jvi.00996-21-s0004.pdf]

**Table S1: compounds repurchased and tested in 12-point dose response curves.**

List of compounds identified during the primary screen and validated after cherry pick in dose-response. Chemical structure, SMILES, dose-response curve during the validation, and after powder repurchase are also illustrated.
